# Supplementary material
Source: publisher figshare collection journal article supplement (https://frontiersin.figshare.com/ndownloader/files/28034661)
Supplement: Supplementary file 1 [file 28034661]

Table S6
Taxon	CAP1
Prasinoderma_6ac	0.2237
Stephanodiscus_0c0	-0.2237
Chaetoceros_dcd	0.2081
Phaeocystis_4dc	-0.2081
Rhizosolenia_006	-0.1977
Rhizosolenia_d78	0.1821
Chaetoceros_734	0.1821
Mytilus_4a8	0.1768
Hincksia_8a1	-0.1768
Minutocellus_5ae	-0.1612
